# Supplementary material for: Optimization of second harmonic generation of gold nanospheres and nanorods in aqueous solution: the dominant role of surface area
Source: Royal Society of Chemistry journal article supplement (doi:10.1039/c5cp06850a), 2016-01-01
Supplement: c5cp06850a1.pdf [file c5cp06850a1.pdf]

## Supporting Information

# Optimization of second harmonic generation of gold nanospheres and nanorods in aqueous solution: the dominant role of surface area

*Hoang Minh Ngo, Phuong Phong Nguyen, Isabelle Ledoux-Rak\**

| <b>Table of Contents</b>                                                                                                         | <b>Page</b>  |
|----------------------------------------------------------------------------------------------------------------------------------|--------------|
| <b>A - Characterization of nanoparticles</b>                                                                                     | <b>S1-S4</b> |
| <b>Table S1.</b> UV-Vis maximum absorption wavelengths $\lambda_1$ (AuNSs, AuNRs) and $\lambda_2$ (AuNRs) of the AuNPs solutions | <b>S2</b>    |
| <b>Figure S1.</b> Molar absorptivity ( $\epsilon$ ) spectra of AuNSs solutions                                                   | <b>S3</b>    |
| <b>Figure S2.</b> UV-Vis absorption spectra of the AuNRs solutions                                                               | <b>S4</b>    |
| <b>B - Nonlinear optical (NLO) properties of various AuNPs</b>                                                                   | <b>S5</b>    |
| <b>Table S2.</b> First hyperpolarizability ( $\beta$ ) of Au per atom and per particle                                           | <b>S5</b>    |
| <b>C- The dipolar response</b>                                                                                                   | <b>S6</b>    |
| <b>D - Detailed description of the Harmonic Light Scattering set-up and measurement procedure</b>                                | <b>S7</b>    |

## A - Characterization of nanoparticles

UV-Vis absorption spectra of the obtained solutions were recorded by UV-Vis spectroscopy (Lambda 950). Particles sizes were determined by TEM using a JEOL Model JEM-1400 at 100kV.

The measurement of SHG from AuNPs was done by Harmonic light scattering at 1.064 $\mu$ m from a Q- switched Nd<sup>3+</sup>: YAG nanosecond laser (SAGA from Thales Laser) at a 10 Hz repetition rate. The detected signal is then sampled, averaged processed by a computer. A low intensity reference beam is extracted from the main beam at a 45° incidence angle by a glass plate and focused onto a highly nonlinear NPP (N-4-nitrophenyl-prolinol) powder used as a frequency doubler. The variation of the second harmonic intensity scattered from the solution is recorded on the computer as a function of the reference second harmonic signal provided by the NPP powder, both signals scaling as the square of the incoming fundamental intensity  $I_\omega$ .

The scattered harmonic signal  $I^{2\omega}$  from a solution is given by:

$$I^{2\omega} = g \left( N_s \langle \beta_s^2 \rangle + N \langle \beta^2 \rangle \right) I_\omega^2$$

where  $g$  is a geometry factor,  $N_s$  and  $N$  are the number of solvent molecules and nanoparticles per unit volume respectively;  $\beta_s$  and  $\beta$  are the molecular hyperpolarizability of the solvent and nanoparticle, respectively. From the slopes  $P$  (respectively  $P_0$ ) of the lines obtained for the solution (respectively solvent) by recording the variation of  $I^{2\omega}$  as a function of  $I_{NPP}^{2\omega}$  (the SHG intensity from a reference NLO material (NPP) sample which is proportional to  $I_\omega^2$ ), we can infer the  $\beta$  values of the nanoparticles.<sup>17,26,27</sup>

## UV-Vis spectra

In order to optically characterize the AuNPs solutions, their UV–Vis absorption spectra were recorded. These spectra are given in Table 1, Figure S1 and Figure S2.

**Table S1.** UV-Vis maximum absorption wavelengths  $\lambda_1$  (AuNSs, AuNRs) and  $\lambda_2$  (AuNRs) of the AuNPs solutions. For AuNRs, L is the length and W the diameter of the rods

| sample | $\lambda_1$ (nm) | $\lambda_2$ (nm) | diameter (nm)     | aspect ratio (AR) |
|--------|------------------|------------------|-------------------|-------------------|
| AuNS 1 | 505              |                  | 3.0               | 1                 |
| AuNS 2 | 522              |                  | 11.6              | 1                 |
| AuNS 3 | 524              |                  | 15.8              | 1                 |
| AuNS 4 | 525              |                  | 17.4              | 1                 |
| AuNS 5 | 527              |                  | 20.0              | 1                 |
| AuNS 6 | 530              |                  | 43.0              | 1                 |
| AuNS 7 | 550              |                  | 80.0              | 1                 |
| AuNR 1 | 549              | 634              | 20.6(L) - 14.0(W) | 1.47              |
| AuNR 2 | 543              | 637              | 20.4(L) - 12.5(W) | 1.63              |
| AuNR 3 | 539              | 639              | 20.4(L) - 8.9(W)  | 2.30              |

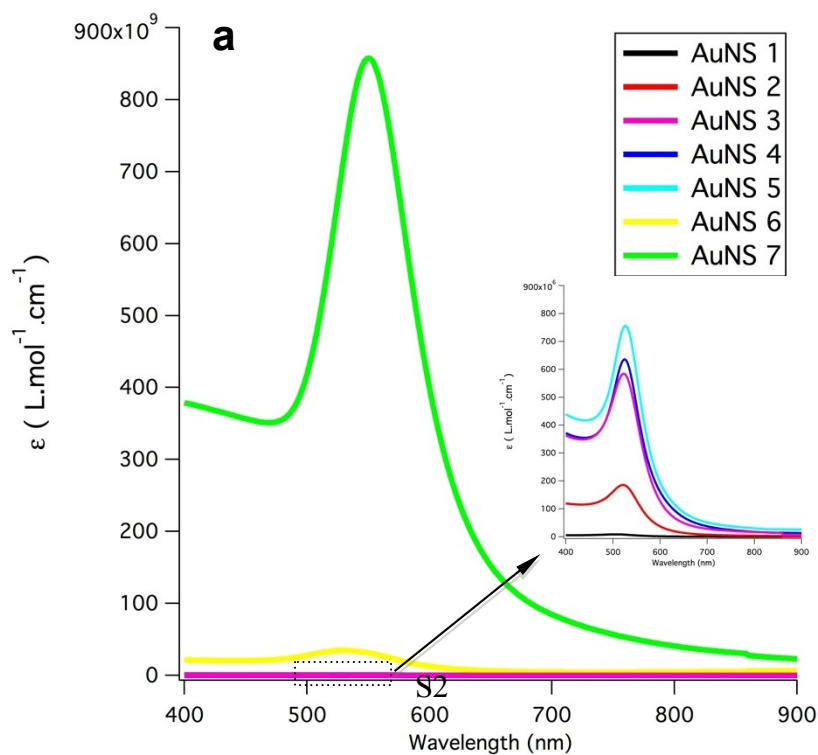

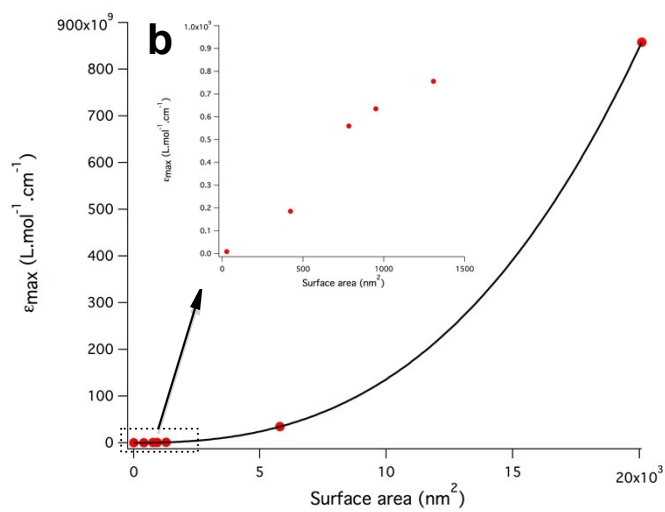

**Figure S1.** Molar absorptivity ( $\epsilon$ ) spectra of AuNSs solutions

(a) The insert shows magnified spectra for small NP's.

(b) Plot of  $\epsilon_{\max}$  (as measured at  $\lambda_1$ ) as a function of the surface area of NP's. Insert: magnification for small particles.

It can be easily inferred from the red shift of the position of the peak maxima (from 505 to 550nm) that the size of AuNSs increases (from 3.0 to 80.0nm) in Figure S1. The role of the surface area is exemplified in Figure S1b, the molar extinction coefficient at the peak maximum,  $\epsilon_{\max}$ , displaying a quasi linear dependence with surface area in the case of small particles, with a faster growth rate for the largest ones.

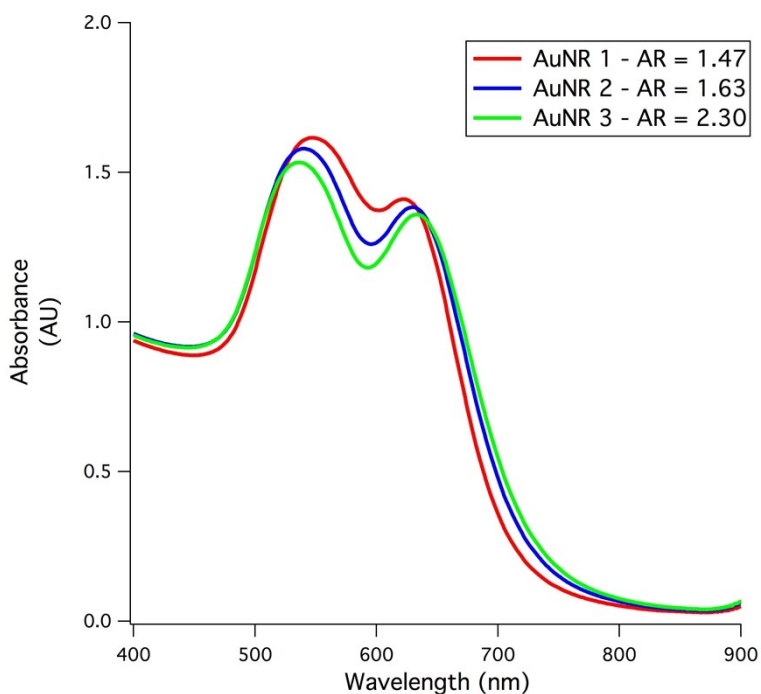

**Figure S2.** UV-Vis absorption spectra of the AuNRs solutions.

For nanorods, the expected two distinct surface plasmon resonances (SPR) are clearly observed from Figure S2: one ( $\lambda_1$ ) is associated with a transverse SPR mode and the other one ( $\lambda_2$ ) associated with a longitudinal SPR mode. In Figure S2, while the transverse band is insensitive to the size of the nanorods, the longitudinal band is significantly red shifted when increasing the aspect ratio  $AR$  ( $AR=\text{length}/\text{width}$ ).<sup>14,16,17</sup>

## B - Nonlinear optical (NLO) properties of various AuNPs

**Table S2.** First hyperpolarizability ( $\beta$ ) of Au per atom and per particle

| sample | diameter (nm)                         | surface area (nm <sup>2</sup> ) | volume (nm <sup>3</sup> ) | N <sub>Au</sub> per particle | particle conc. | $\beta$ per particle ( $\beta$ ) (10 <sup>-26</sup> ) esu | $\beta$ per atom ( $\beta'$ ) (10 <sup>-30</sup> ) esu | $\beta_R$ (10 <sup>-20</sup> ) esu |
|--------|---------------------------------------|---------------------------------|---------------------------|------------------------------|----------------|-----------------------------------------------------------|--------------------------------------------------------|------------------------------------|
| AuNS 1 | 3.0                                   | 30                              | 15                        | 800                          | 8.80E-08       | 0.4                                                       | 130                                                    | 1                                  |
| AuNS 2 | 11.6                                  | 420                             | 820                       | 48000                        | 3.04E-09       | 3.4                                                       | 160                                                    | 0.56                               |
| AuNS 3 | 15.8                                  | 780                             | 2100                      | 120000                       | 9.06E-10       | 6.5                                                       | 190                                                    | 0.57                               |
| AuNS 4 | 17.4                                  | 950                             | 2800                      | 160000                       | 9.02E-10       | 8.3                                                       | 210                                                    | 0.61                               |
| AuNS 5 | 20.0                                  | 1300                            | 4200                      | 240000                       | 5.94E-10       | 13                                                        | 270                                                    | 0.72                               |
| AuNS 6 | 43.0                                  | 5800                            | 42000                     | 2400000                      | 4.0E-11        | 58                                                        | 370                                                    | 0.69                               |
| AuNS 7 | 80.0                                  | 20100                           | 270000                    | 16000000                     | 1.28E-12       | 260                                                       | 660                                                    | 0.9                                |
| AuNR 1 | 20.6(L) - 14.0(W)<br><i>AR</i> = 1.47 | 1200                            | 3200                      | 190000                       | 3.11E-09       | 6.6                                                       | 150                                                    |                                    |
| AuNR 2 | 20.4(L) - 12.5(W)<br><i>AR</i> = 1.63 | 1050                            | 2500                      | 150000                       | 1.99E-09       | 4.7                                                       | 120                                                    |                                    |
| AuNR 3 | 20.4(L) - 8.9(W)<br><i>AR</i> = 2.30  | 700                             | 1300                      | 73000                        | 3.96E-09       | 2.9                                                       | 110                                                    |                                    |

### C- The dipolar response

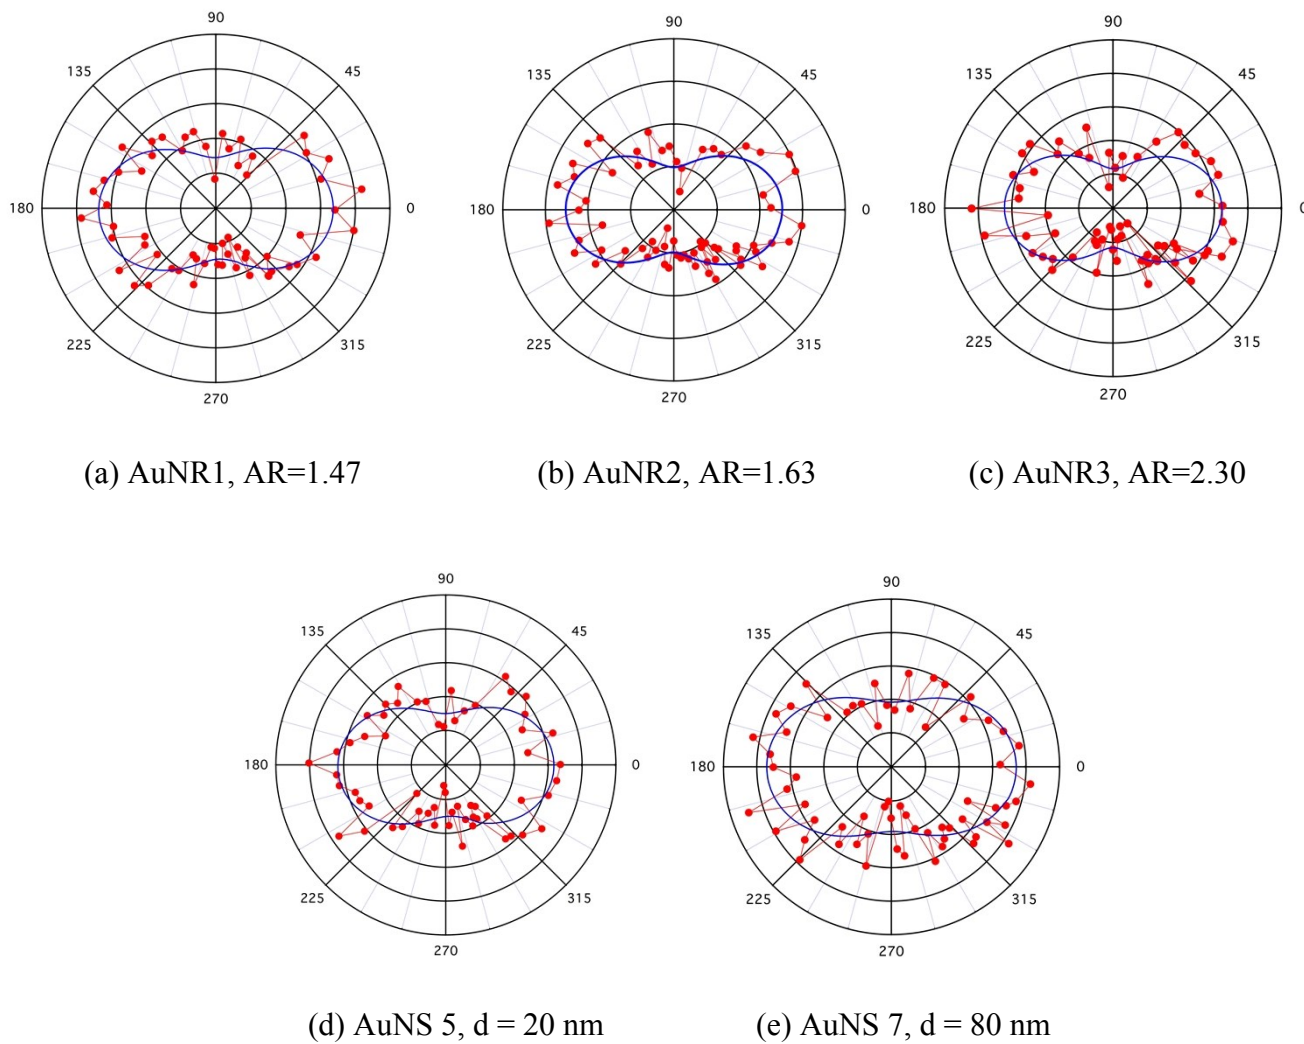

**Figure S3.** Polar plot of the polarization resolved HRS intensity as a function of the input polarization recorded for the AuNRs and AuNSs at 1064 nm.

#### **D - Harmonic Light Scattering experiment**

The approach followed here relies on Harmonic Light Scattering (HLS) as initially proposed and developed by Terhune and Maker<sup>i</sup>. A transverse single mode Nd<sup>3+</sup>:YAG laser is used as the fundamental source, consisting of 10 MW peak power, 3 ns duration IR pulses at 1.064  $\mu\text{m}$  repetition rate 10 Hz). The incident IR intensity can be continuously monitored by a half-wave plate rotated between two crossed Glan polarizers. A small part of the incident beam is removed at a low reflection angle by a glass plate and sent onto a highly nonlinear NPP (N-4-nitrophenyl-prolinol)<sup>(ii)</sup> powder used as a reference frequency doubler. The emitted second harmonic signal is detected by a photomultiplier. The main fundamental beam (vertically polarized) is focused into the sample using a 8 cm focal length converging lens. The sample consists in an adequately designed parallelepipedic spectrophotometric cell presenting four polished windows so as to allow for simultaneous longitudinal illumination and transverse collection of the scattered emission. Collection of the HLS photons at 532 nm is performed in the transverse off-axis 90° direction, using a large (diameter 50 mm) and short focal distance ( $f = 50$  mm) spherical lens in order to focus the light onto the photocathode of a photomultiplier tube. The numerical aperture of the optical collection system is low so as to avoid the depolarizing contribution of the off-axis beams. The detected reference and scattered harmonic signals, after spectral selection through an interference filter with 5 nm spectral resolution, are then sampled and averaged using a home-made acquisition card and processed by a computer. Variation of the scattered second harmonic intensity from the solution is recorded on the computer as a function of the reference second harmonic signal provided by the NPP powder, which scales like the square of the incoming fundamental intensity. Then  $\langle\beta^2\rangle$  and  $\beta$  (defined as  $\sqrt{\langle\beta^2\rangle}$ ) values are inferred from the slopes of the resulting lines. Calibrations are made with respect to the pure water solvent.



HLS depolarization measurements<sup>iii</sup> are made by varying the angle  $\phi$  of the linearly polarized beam using the rotation of a second half-wave plate set after the glass plate, in order to keep its reflectivity from being polarization dependent.

---

<sup>i</sup> Terhune, R.W. ; Maker, P.D. ; Savage, C.M. *Phys. Rev. Lett.* **1965**, *14*, 681 ; Maker, P.D. *Phys. Rev. A*, **1970**, *1*, 923.

<sup>ii</sup> Zyss, J.; Nicoud, J.F.; Coquillay, M. *J. Chem. Phys.***1984**, *81*, 4160 .

<sup>iii</sup> Brasselet, S.; Zyss, J. *J. Opt. Soc. Am.B* **1998**, *15*, 257.
